# Supplementary material
Source: PubMed Central journal article supplement (PMC8380741)
Supplement: NIHMS1727837-supplement-2.pdf [file NIHMS1727837-supplement-2.pdf]

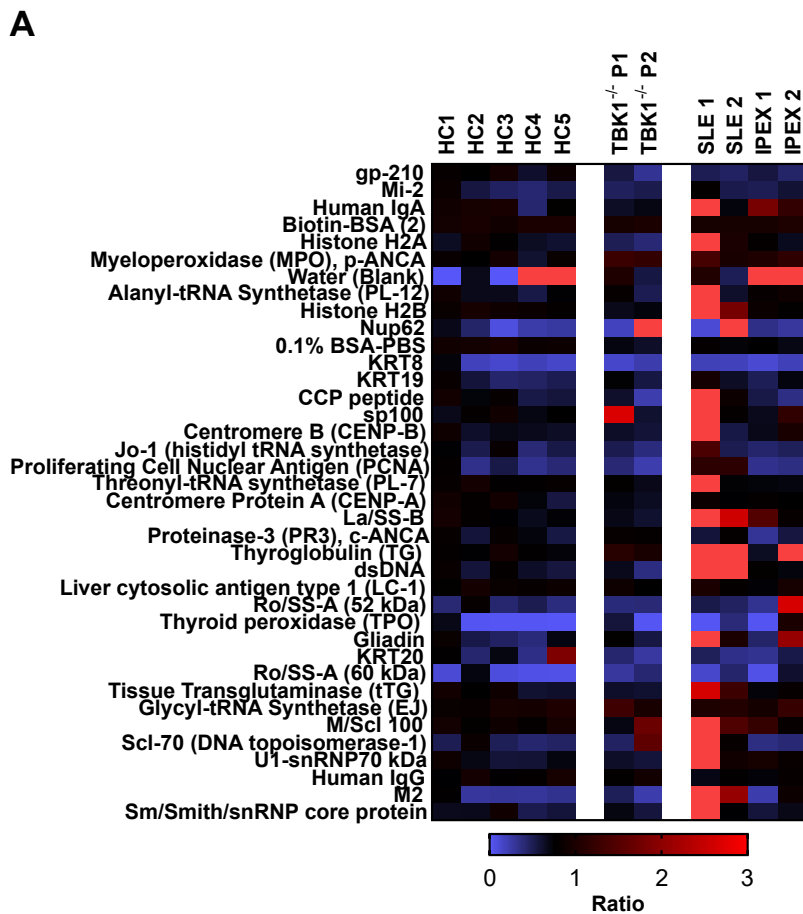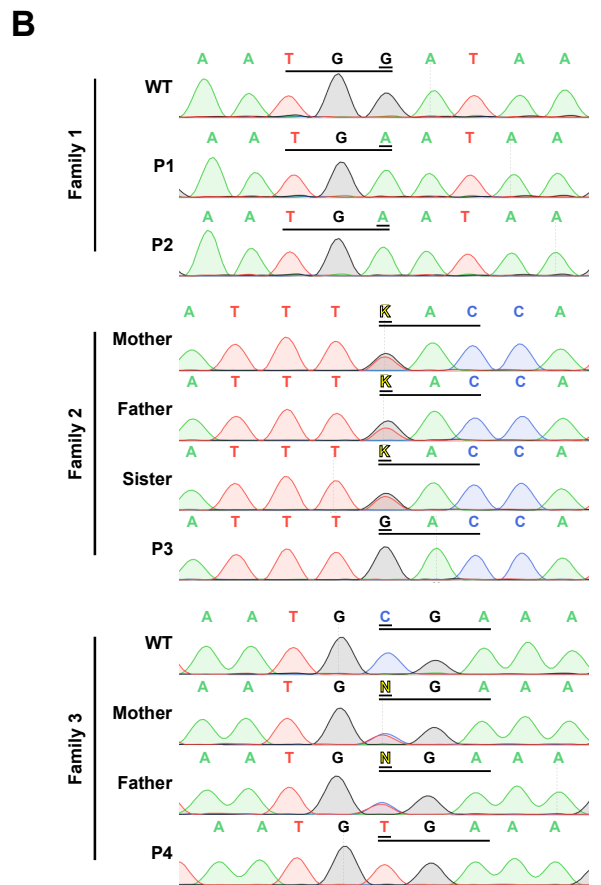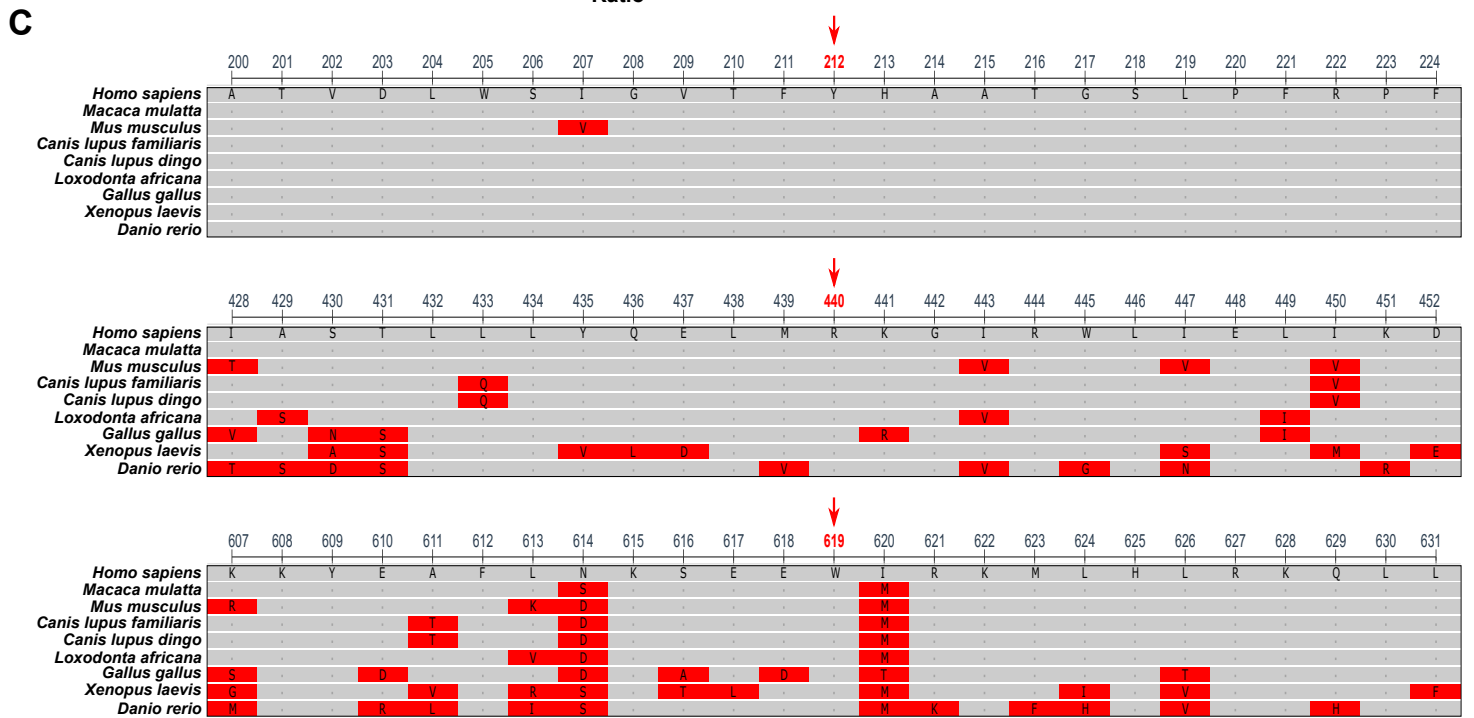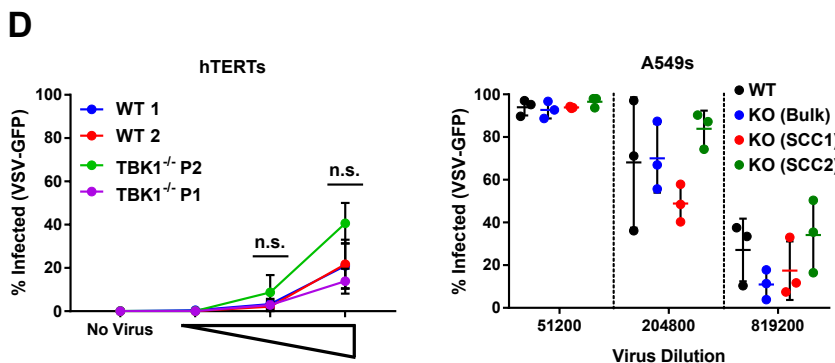

**E**

Type-1-IFN signature in mRNA from peripheral blood (age)

|                                         | P1 (29)   | P2 (23)   | Mean 10 HCs  |
|-----------------------------------------|-----------|-----------|--------------|
| Relative expression 6ISG's (median *10) | 8.5 / 6.2 | 3.2 / 3.2 | 11.2 +/- 5.1 |
| IFN score (log10)*                      | 0.9 / 0.8 | 0.5 / 0.5 | 1.0 +/- 0.23 |

\*aberrant IFN score >1.7
