# Supplementary material
Source: PubMed Central journal article supplement (PMC8380741)
Supplement: NIHMS1727837-supplement-11.pdf [file NIHMS1727837-supplement-11.pdf]

**Supplemental Table 3: Homozygous variants in P1 and P2 identified by exome sequencing, Related to Figure 1 and the Human Subjects section of the STAR Methods.**

| Gene          | Genom. Pos (hg19) | Protein change | CADD-score | gnomAD pLI | gnomAD MAF |
|---------------|-------------------|----------------|------------|------------|------------|
| <b>EMP1</b>   | 12:13364476T>G    | V11G           | 26.7       | 0.5        | 0.001132   |
| <b>N6AMT2</b> | 13:21331602C>T    | G45K           | 26.9       | 0          | NA         |
| <b>PDE3A</b>  | 12:20523148G>T    | R310S          | 26.8       | 0          | 0.00001284 |
| <b>CCR8</b>   | 3:39374669C>T     | H283Y          | 23         | 0.01       | NA         |
| <b>TBK1</b>   | 12:64890825G>A    | W619*          | 39         | 1          | NA         |

Genom. Pos: genomic coordinates of variant in the human reference assembly (GRCh37/hg19); CADD score, Combined Annotation Dependent Depletion deleteriousness score; gnomAD pLI, Genome Aggregation Database probability of being loss-of-function intolerant score; Genome Aggregation Database minor allele frequency
