# Supplementary material
Source: PubMed Central journal article supplement (PMC8380741)

**A**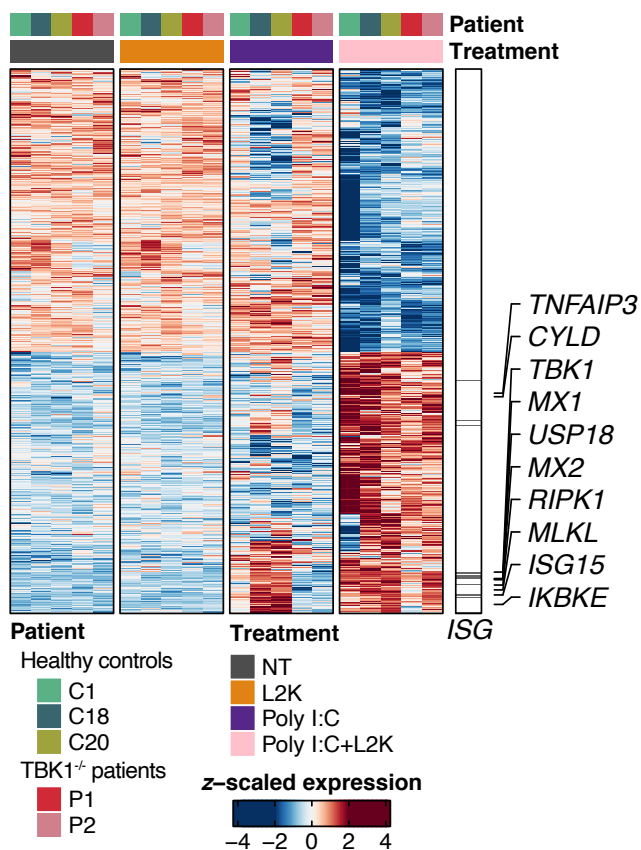**C**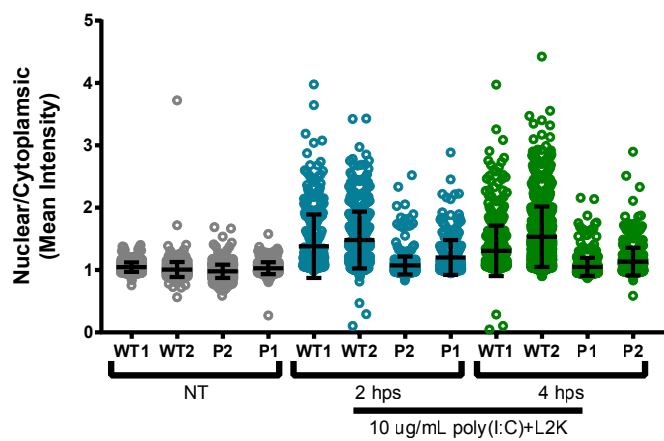**F**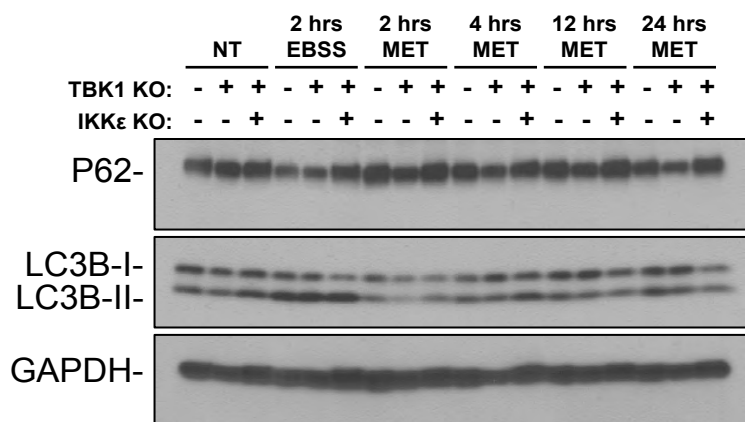**B**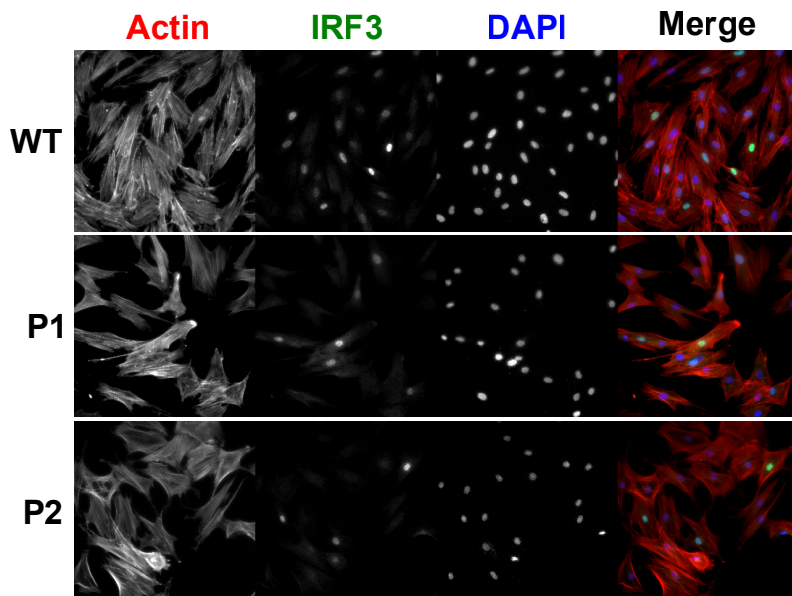**D**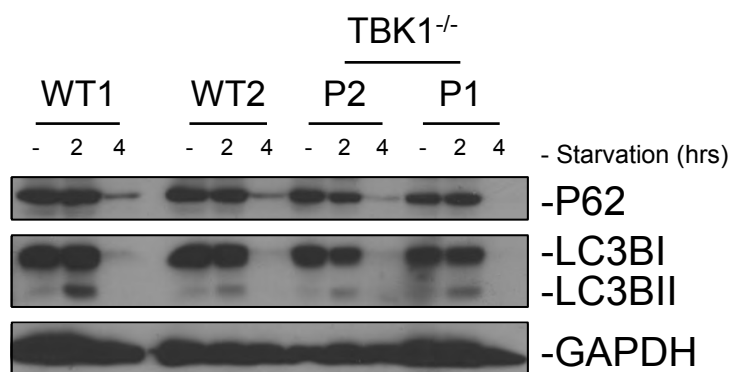**E**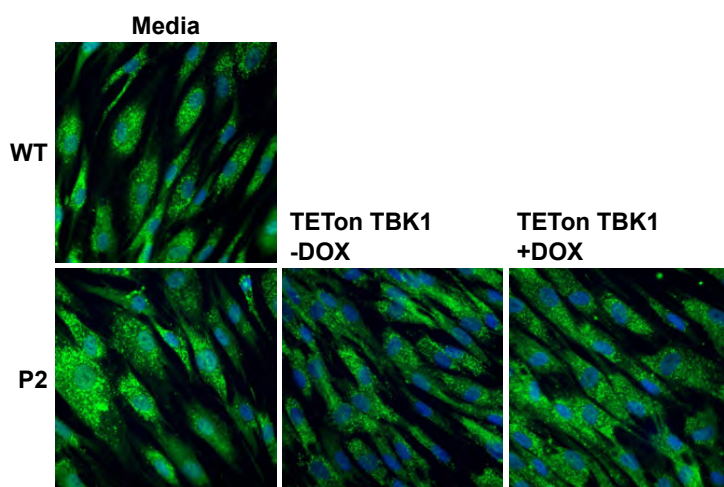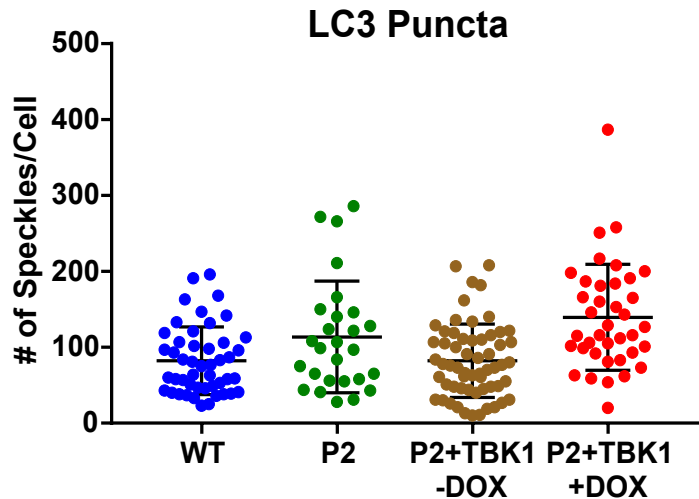

Supplement: NIHMS1727837-supplement-5.pdf [file NIHMS1727837-supplement-5.pdf]

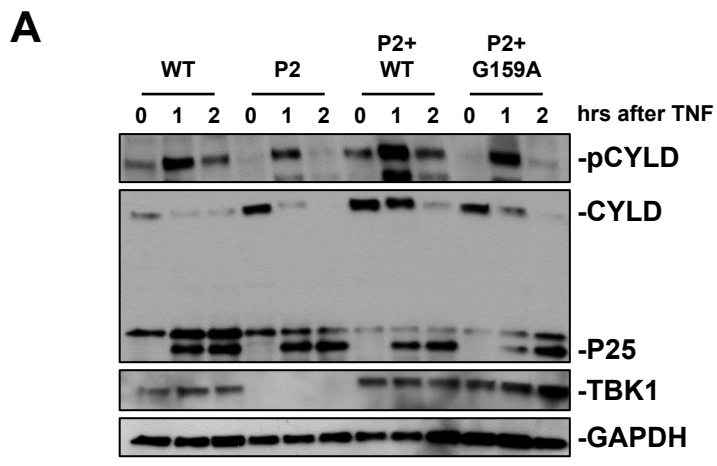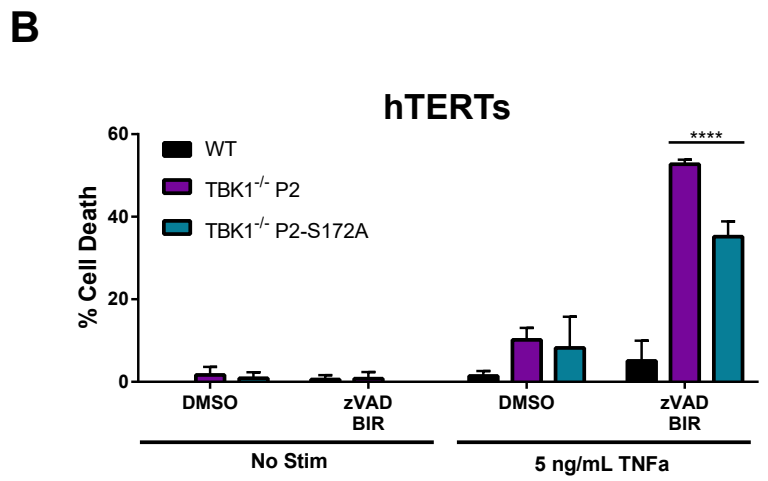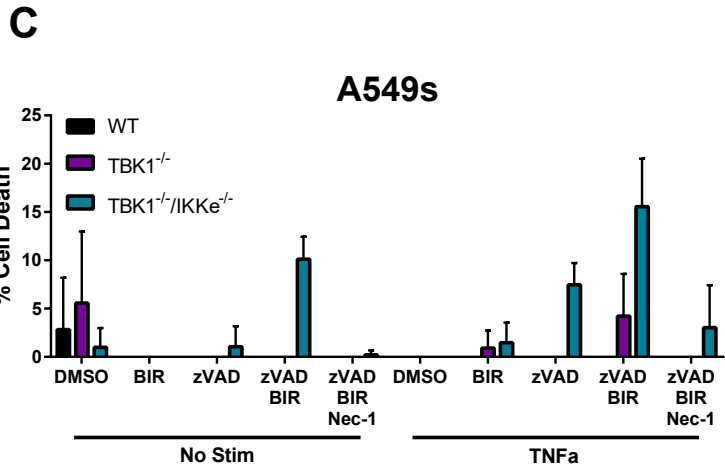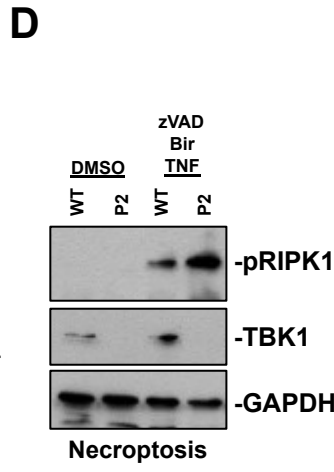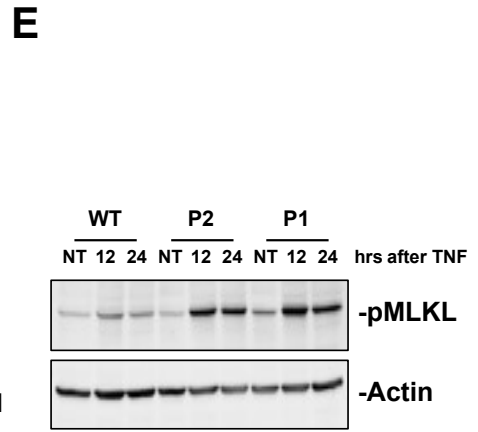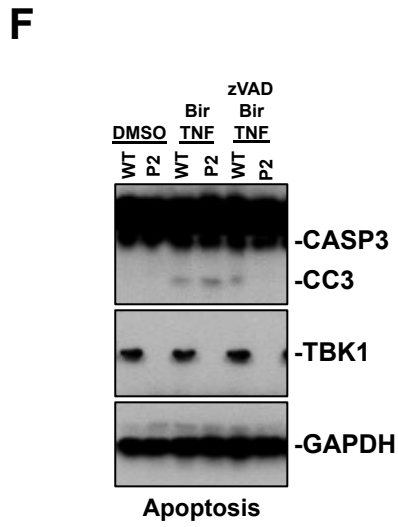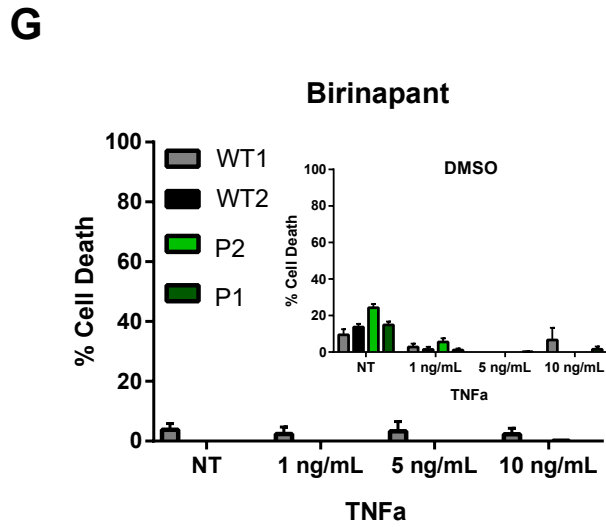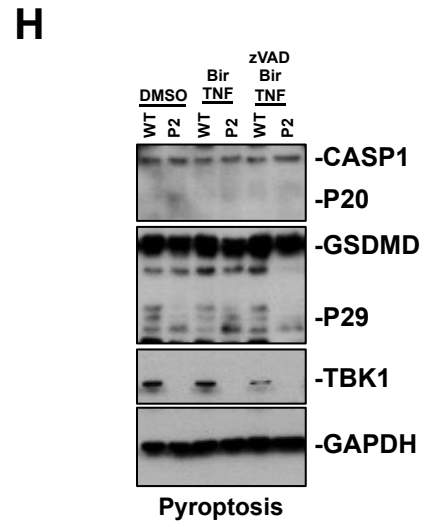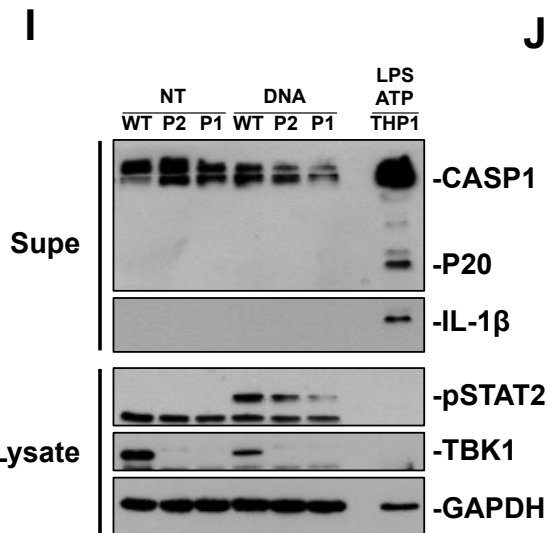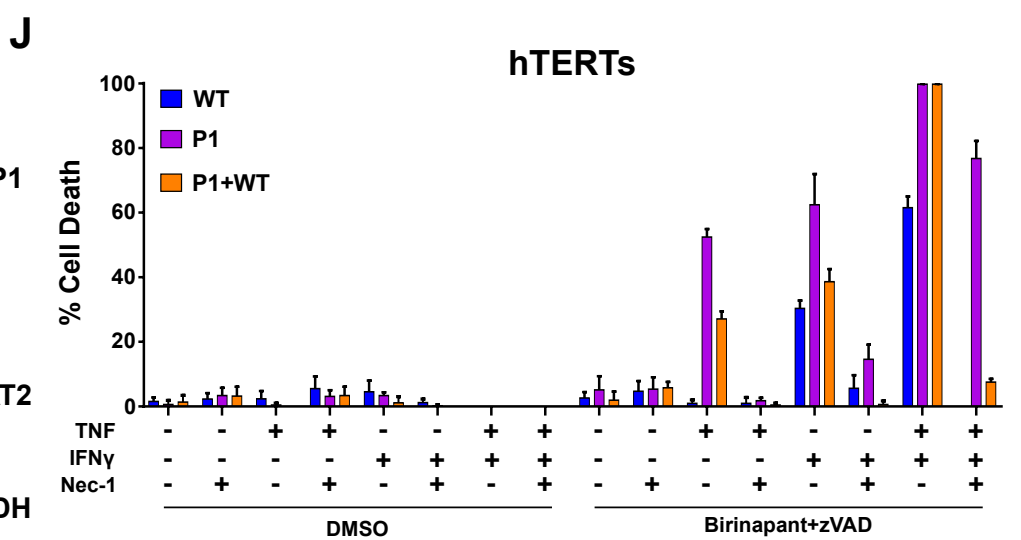

Supplement: NIHMS1727837-supplement-6.pdf [file NIHMS1727837-supplement-6.pdf]
